# Supplementary material for: Effects of Module Truncation of a New Alginate Lyase VxAly7C from Marine Vibrio xiamenensis QY104 on Biochemical Characteristics and Product Distribution
Source: MDPI journal article supplement (doi:10.3390/ijms23094795), 2022-04-27
Supplement: s1 [file s1]

## Supplementary material

### Effects of module truncation of a new alginate lyase VxAly7C from marine *Vibrio xiamenensis* QY104 on biochemical characteristics and product distribution

Luyao Tang<sup>1,2,3,4,5</sup>, Mengmeng Bao<sup>1,2,3,4</sup>, Ying Wang<sup>1,2,3,4</sup>, Zheng Fu<sup>1,2,3,4</sup>, Feng Han<sup>1,2,3,4\*</sup>, Wengong Yu<sup>1,2,3,4\*</sup>

**Table S1. PCR primers for the recombinant VxAly7C and its truncated mutants**

| Primer name    | Primer sequence (5'-3')                            | Recombinant enzyme                         |
|----------------|----------------------------------------------------|--------------------------------------------|
| PVxAly7C-FL-F  | GGAATTCC <b>ATAT</b> GCAGAGTGG<br>TTGTGTGCAAAGT    | VxAly7C-FL                                 |
| PVxAly7C-FL-R  | ACGCG <b>TCGAC</b> TTTATATTGATT<br>ATGTGATGTTGTAA  | VxAly7C-FL,<br>VxAly7C-TM1,<br>VxAly7C-TM2 |
| PVxAly7C-TM1-F | GGAATTCC <b>ATAT</b> GGACGCGTG<br>CTCTAATCAAGAA    | VxAly7C-TM1                                |
| PVxAly7C-TM2-F | GGAATTCC <b>ATAT</b> GGATAACCA<br>TATTATTACTGATAAG | VxAly7C-TM2                                |

The bases in bold are recognition sites for restriction endonuclease enzymes.
